# Supplementary material for: Mixing state and sources of submicron regional background aerosols in the northern Qinghai–Tibet Plateau and the influence of biomass burning
Source: Copernicus journal article supplement (doi:10.5194/acp-15-13365-2015), 2015-12-02
Supplement: Supplementary file 1 [file acp-15-13365-2015-supplement.pdf]

Supplement of Atmos. Chem. Phys., 15, 13365–13376, 2015  
<http://www.atmos-chem-phys.net/15/13365/2015/>  
doi:10.5194/acp-15-13365-2015-supplement  
© Author(s) 2015. CC Attribution 3.0 License.

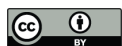

Atmospheric  
Chemistry  
and Physics  
Open Access  
EGU

*Supplement of*

## **Mixing state and sources of submicron regional background aerosols in the northern Qinghai–Tibet Plateau and the influence of biomass burning**

**W. J. Li et al.**

*Correspondence to:* W. J. Li (liweijun@sdu.edu.cn) and J. M. Chen (jmchen@sdu.edu.cn)

The copyright of individual parts of the supplement might differ from the CC-BY 3.0 licence.

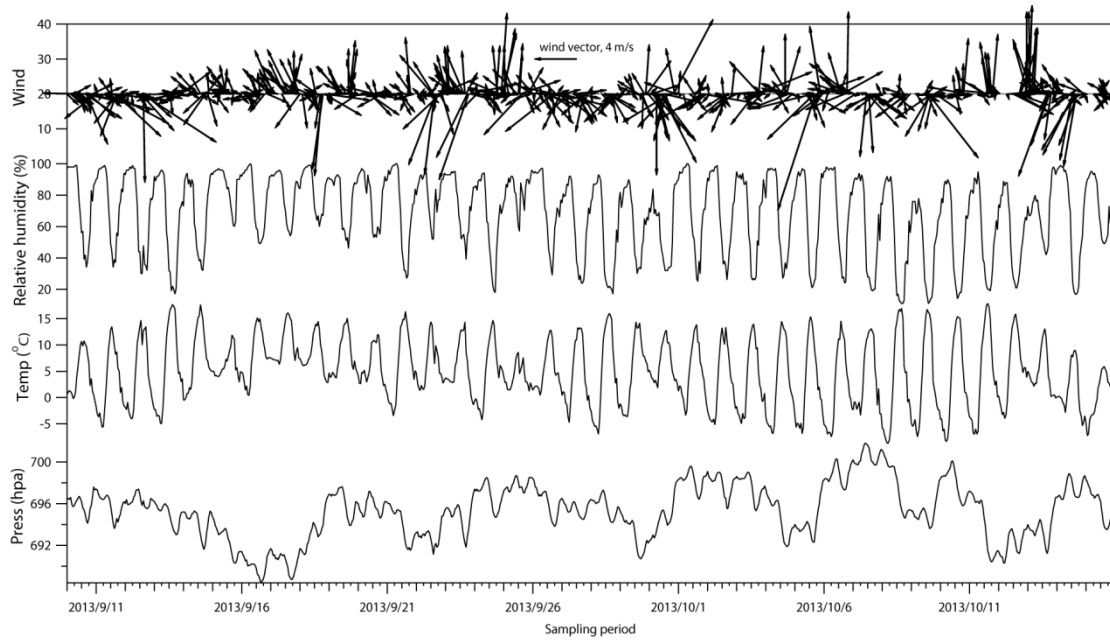

**Figure S1** Meteorological data at sampling site during 11 September-15 October. The measured meteorological data include wind speed and direction, relative humidity, Temperature, and pressure.

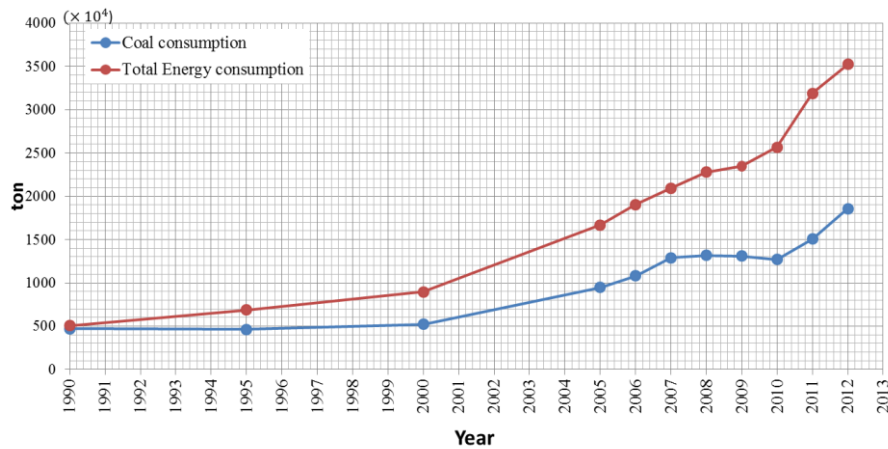

**Figure S2** The total energy consumption and coal consumption from 1990 to 2013 in Qinghai province. Unit of total energy is converted the equivalent weight of standard coal. Data is from China energy statistical yearbook (2013) (Wen et al., 2013)

## References

Wen, J., Meng, H., Wang, X., and coauthors: China Energy Statistical Yearbook, Department of Energy

Statistics, National Bureau of Statistics, People's Republic of China, Beijing, 1-355, 2013.
